# Supplementary material
Source: PubMed Central journal article supplement (PMC3419062)

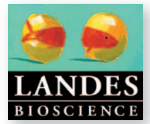

## **Supplemental Material to:**

**Nuo Yang, Carl D. Morrison, Peijun Liu, Jeff Miecznikowski,  
Wiam Bshara, Suxia Han, Qing Zhu, Angela R. Omilian, Xu  
Li and Jianmin Zhang**

**TAZ induces growth factor-independent proliferation  
through activation of EGFR ligand amphiregulin**

**2012; 11(15)**

**<http://dx.doi.org/10.4161/cc.21386>**

**<http://www.landesbioscience.com/journals/cc/article/21386>**

A

Vector

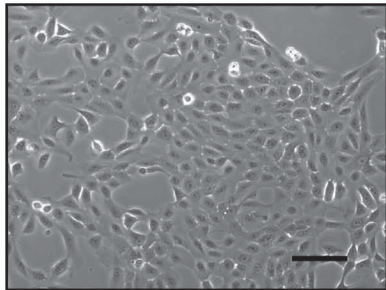

TAZ-4SA

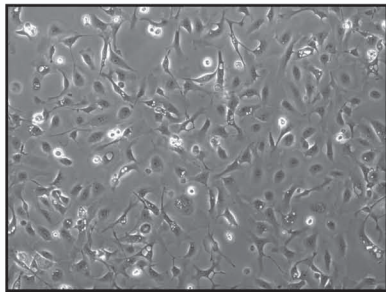

B

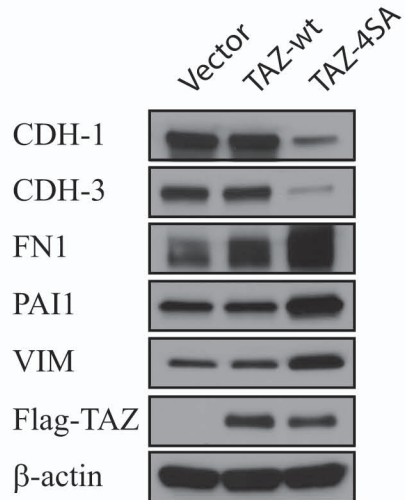

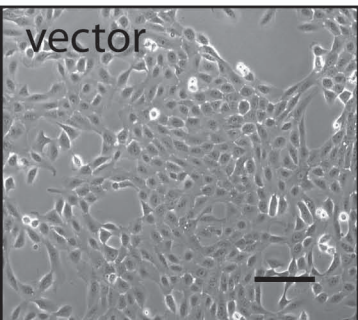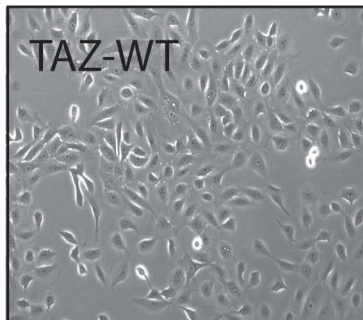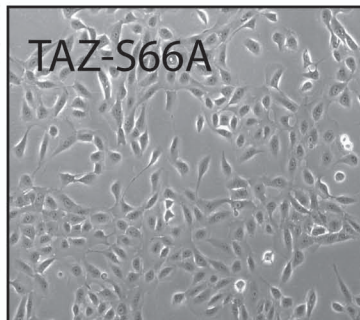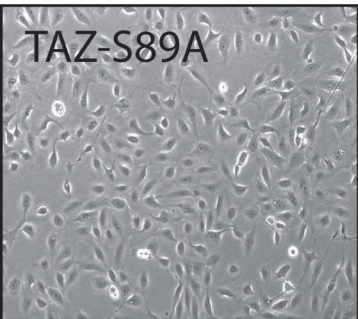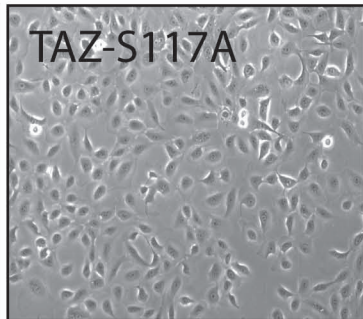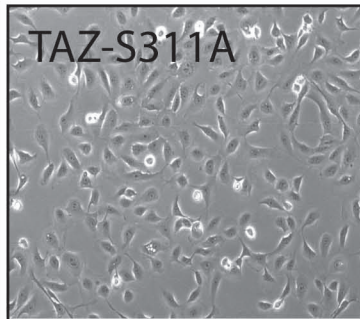

Supplement: cc-11-2922-s01.pdf [file cc-11-2922-s01.pdf]
